# Supplementary material for: A RE-AIM evaluation of evidence-based multi-level interventions to improve obesity-related behaviours in adults: a systematic review (the SPOTLIGHT project)
Source: PubMed Central journal article supplement (PMC4266878; doi:10.1186/s12966-014-0147-3), 2014-12-06
Supplement: 12966_2014_147_MOESM2_ESM.pdf [file 12966_2014_147_MOESM2_ESM.pdf]

## Additional file 2: Characteristics of the included studies

| Reference<br>(Name<br>intervention,<br>Author, Date)                                                                                                                              | Focus<br>(PA, SB,<br>EB*) | Study<br>design                      | Target<br>population                          | Study participants<br>(I, C**) (n)                                                                                                                                                                     | Environmental<br>intervention<br>components                                                                                                                                                                                                     | Individual<br>intervention<br>components                                                                                         | Outcome measurements                                                                                                                                                                                          | European<br>(E) or Non-<br>European<br>Study<br>(NE)*** |
|-----------------------------------------------------------------------------------------------------------------------------------------------------------------------------------|---------------------------|--------------------------------------|-----------------------------------------------|--------------------------------------------------------------------------------------------------------------------------------------------------------------------------------------------------------|-------------------------------------------------------------------------------------------------------------------------------------------------------------------------------------------------------------------------------------------------|----------------------------------------------------------------------------------------------------------------------------------|---------------------------------------------------------------------------------------------------------------------------------------------------------------------------------------------------------------|---------------------------------------------------------|
| <b>1.Romsas in Motion</b><br>Jenum A.K. et al.; 2003<br>Jenum A.K. et al.; 2006<br>Lorentzen C. et al.; 2007<br>Jenum A.K. et al.; 2009                                           | PA                        | Cluster-randomised controlled design | Age: 30 – 67 years<br>I: Romsas<br>C: Furuset | Baseline (2000):<br>I: 1497 participants<br>C: 1453 participants<br>Follow-up (2003):<br>I: 890 participants<br>C: 876 participants                                                                    | - Walking groups<br>- Group sessions for indoor activity at no cost<br>- Social support by the district administration staff<br>- Labeling of walking trails<br>- Improving street lighting<br>- Gritting of pavements and trials in the winter | - Leaflets<br>- Reminders of the health benefits of using the stairs<br>- Local meetings about health<br>- Individual counseling | - Health status, self-reported disease, health-related behaviour (questionnaire)<br>- Body height, weight, waist and hip circumferences, blood pressure, cholesterol, glucose, lipids (clinical measurements) | E: Norway, Oslo                                         |
| <b>2. 10.000 steps Flanders</b><br>De Cocker K.A. et al.; 2007<br>Van Acker R. et al.; 2011<br>De Cocker K.A. et al.; 2011<br>Van Acker R. et al.; 2012<br>Dubuy V. et al. ; 2013 | PA                        | Cluster-randomised controlled design | Age: 25 – 75 years<br>I: Ghent<br>C: Aalst    | Baseline (2005):<br>I: 872 participants<br>C: 810 participants<br>Follow-up1 (2006):<br>I: 660 participants<br>C: 634 participants<br>Follow-up2 (2009):<br>I: 216 participants<br>C: 204 participants | - Street signs, walking routes<br>- Sale and loan of pedometers                                                                                                                                                                                 | - Website<br>- Local media project<br>- Flyers, posters etc.                                                                     | - PA (questionnaire: IPAQ)<br>- Steps (pedometer + activity log)<br>- Awareness of the 10.000 steps Ghent (questionnaire)                                                                                     | E: Belgium; Ghent, Flanders                             |
| <b>3. 10.000 steps Rockhampton</b><br>Brown W.J. et al.; 2006<br>Eakin E.G. et al. ; 2007<br>Mummery W.K. et al.; 2006                                                            | PA                        | Cluster-randomised controlled design | Age > 18 years<br>I: Rockhampton<br>C: Mackay | Baseline (2001):<br>I: 1280 participants<br>C: 1059 participants<br>Follow-up (2003):<br>I: 1242 participants<br>C: 1236 participants                                                                  | - Improve the local environment, e.g. repairing key footpaths, erecting 10,000 steps signs                                                                                                                                                      | - Loan of pedometers<br>- Logbooks are available<br>- Print, radio and TV media campaign<br>- Advice of general practitioners    | - Changes in physical activity (questionnaire: Active Australia Survey)<br>- Awareness of the 10,000 steps project (questionnaire)<br>- Pedometer use (questionnaire)                                         | NE: Australia, Rockhampton                              |
| <b>4. Isfahan Healthy Heart Programme</b>                                                                                                                                         | PA and EB                 | Cluster-randomised                   | Age range not specified                       | Baseline (2000):<br>I: 6175 participants                                                                                                                                                               | - Development of public exercise areas and green                                                                                                                                                                                                | - Campaigns and multi-media, education of                                                                                        | - Physical activity (questionnaire)                                                                                                                                                                           | NE: Iran, Isfahan                                       |

|                                                                                                                                                                                                                                                                |                  |                                                                   |                                                  |                                                                                                                                                                                                                                                                                                          |                                                                                                                                                                                                                                                               |                                                                                                                                                                                                                                                        |                                                                                                                                                                                                                   |                              |
|----------------------------------------------------------------------------------------------------------------------------------------------------------------------------------------------------------------------------------------------------------------|------------------|-------------------------------------------------------------------|--------------------------------------------------|----------------------------------------------------------------------------------------------------------------------------------------------------------------------------------------------------------------------------------------------------------------------------------------------------------|---------------------------------------------------------------------------------------------------------------------------------------------------------------------------------------------------------------------------------------------------------------|--------------------------------------------------------------------------------------------------------------------------------------------------------------------------------------------------------------------------------------------------------|-------------------------------------------------------------------------------------------------------------------------------------------------------------------------------------------------------------------|------------------------------|
| <p>Sarrafzadegan N. et al. ; 2003<br/> Sarrafzadegan N. et al. ; 2008<br/> Rabiei K. et al. ; 2009<br/> Rabiei K. et al. ; 2010<br/> Boshtam M. et al. ; 2010<br/> Khosravi A. et al. ; 2010<br/> Baghaei A. et al. ; 2010<br/> Tavasolli A. et al. ; 2011</p> |                  | <p>controlled design<sup>8</sup></p>                              | <p>I: Isfahan and Najafabad<br/> C: Arak</p>     | <p>C: 6339 participants<br/> Follow-up1 (2001): I: 2994 participants<br/> C: 2897 participants<br/> Follow-up2 (2002): I: 2400 participants<br/> C: 2393 participants<br/> Follow-up3 (2003): I: 3012 participants<br/> C: 3070 participants<br/> Follow-up4 (2004): I: 3011 participants<br/> C: NA</p> | <p>spaces<br/> - Increase in the number of sport centers<br/> - Development of the infrastructures required for reducing the use of personal motor vehicles and encouraging cycling and walking<br/> - Modification and improvement of urban environments</p> | <p>specific target groups, face-to-face education, class education</p>                                                                                                                                                                                 | <p>- Dietary intake (questionnaire : FFQ)<br/> - Smoking behaviour (questionnaire)</p>                                                                                                                            |                              |
| <p><b>5. The Agita São Paulo Program</b><br/> Matsudo V. et al. ; 2002<br/> Matsudo S.M. et al. ; 2003<br/> Matsudo S.M. et al. ; 2005</p>                                                                                                                     | <p>PA</p>        | <p>Pre-experimental design: one group posttest only design</p>    | <p>Age range not specified<br/> I: São Paulo</p> | <p>I : Metropolitan (1999) : 641 participants<br/> (2000) : 645 participants<br/> (2001) : 627 participants<br/> (2002) : 662 participants<br/> (2003): 651 participants<br/><br/> I: SP State (2002): 2001 participants<br/> (2003): 2000 participants</p>                                              | <p>- Mega-events: Agita Trabalhador, Agita Galera, Agita Melhoridade<br/> - Changes to physical spaces: greater access to sporting facilities , creating more green and leisure spaces</p>                                                                    | <p>- Posters, flyers<br/> - Messages in newsletters, magazines of organizations<br/> - Mascot<br/> - Media messages<br/> - Agital: package containing educational materials on physical activity for health professionals to prescribe to patients</p> | <p>- Physical activity level (questionnaire: IPAQ)<br/> - Physical activity knowledge (questionnaire)<br/> - Behaviour stage (questionnaire)<br/> - Recall of the program (questionnaire)</p>                     | <p>NE: Brazil, São Paulo</p> |
| <p><b>6. The Healthy Hawaii Initiative</b><br/> Nigg C. et al.; 2005<br/> Maddock J. et al.; 2006</p>                                                                                                                                                          | <p>PA and EB</p> | <p>Pre-experimental design: one group pretest posttest design</p> | <p>Age range not specified<br/> I: Hawaii</p>    | <p>Baseline (1999) : I : NA<br/> Follow-up1 (2000) : I : NA<br/> Follow-up2 (2001) : I : NA<br/> Follow-up3 (2002) : I : NA<br/> Follow-up4 (2003) :</p>                                                                                                                                                 | <p>- Renovating walking paths<br/> - Changing health screenings<br/> - Making physical venues for older adults<br/> - Increasing healthy choices in restaurants</p>                                                                                           | <p>- Public education campaign ‘Start Living Healthy’ with press releases, radio advertisements, a website</p>                                                                                                                                         | <p>- Mortality rate, diabetes prevalence, obese and overweight prevalence (questionnaire)<br/> - Fruit and vegetables intake, physical activity (questionnaire: BRFSS and YRBS)<br/> - Perceived environment,</p> | <p>NE: Hawaii</p>            |

|                                                                                                                                                                                                     |           |                                      |                                                                                                                                      |                                                                                                                                             |                                                                                                                                                                                                                                                |                                                                                                                                                                                                          |                                                                                                                                                                                                                                       |                                                     |
|-----------------------------------------------------------------------------------------------------------------------------------------------------------------------------------------------------|-----------|--------------------------------------|--------------------------------------------------------------------------------------------------------------------------------------|---------------------------------------------------------------------------------------------------------------------------------------------|------------------------------------------------------------------------------------------------------------------------------------------------------------------------------------------------------------------------------------------------|----------------------------------------------------------------------------------------------------------------------------------------------------------------------------------------------------------|---------------------------------------------------------------------------------------------------------------------------------------------------------------------------------------------------------------------------------------|-----------------------------------------------------|
|                                                                                                                                                                                                     |           |                                      |                                                                                                                                      | I : 4495 participants<br>Follow-up5 (2004) :<br>I : 4476 participants                                                                       |                                                                                                                                                                                                                                                |                                                                                                                                                                                                          | attitudes, subjective norms,<br>stage-of-change, self-<br>efficacy (questionnaire)                                                                                                                                                    |                                                     |
| <b>7. Walk the Ozarks to Wellness</b><br>Brownson R.C. et al. ; 2004<br>Brownson R.C. et al. ; 2005                                                                                                 | PA        | Cluster-randomised controlled design | Age > 18 years<br>I: Six rural communities in Missouri<br>C: Six rural communities in Arkansas en Tennessee                          | Baseline (2003):<br>I: NA<br>C: NA<br>Follow-up (2004):<br>I: 752 participants<br>C: 779 participants                                       | - Walking clubs<br>- Activities such as walk-a-thons                                                                                                                                                                                           | - Computer-based tailoring<br>- Tailored newsletters<br>- Feedback letters by mail<br>- Counseling                                                                                                       | - Physical activity, being aware of project, attending a project WOW event, sometimes or often seeing signs, articles, or other media related to PA, reporting that his physician advised him to exercise more (questionnaire: BRFSS) | NE: United States, Missouri, Arkansas and Tennessee |
| <b>8. Healthworks</b><br>Linde A.J. et al. ; 2012                                                                                                                                                   | PA and EB | Cluster-randomised controlled design | Age: 18-75 years<br>I: three worksite in the Twin Cities metropolitan area<br>C: three worksite in the Twin Cities metropolitan area | Baseline (2006 2007):<br>I: 752 participants<br>C: 995 participants<br>Follow-up (2008-2009):<br>I: 611 participants<br>C: 795 participants | - Organized group walks<br>- Competition between co-workers<br>- Weight tracking competitions<br>- Increase the availability of calorie smart foods<br>- Reduce the price of calorie smart foods<br>- Offer small portion sizes as substitutes | - Label calorie smart items<br>- Activity monitoring (pedometer)<br>- Motivation signs, posters, music were places in select stairwells<br>- Balance beam scales with BMI charts<br>- Monthly newsletter | - Weight, BMI (clinical measurements)<br>- Food inventory (observational study)<br>- Stair use (infrared beam sensors)<br>- Health media environment (observational study)                                                            | NE: US; Minnesota                                   |
| <b>9. Hartslag Limburg</b><br>Ronda G. et al. ; 2004<br>Ronda G. et al. ; 2004<br>Ronda G. et al. ; 2005<br>Schuit A.J. et al. ; 2006<br>Ronckers E.T. et al. ; 2006<br>Verkleij S.P. et al. ; 2011 | PA and EB | Cluster-randomised controlled design | Age : 20 – 59 years<br>I : Maastricht<br>C : NA                                                                                      | Baseline (1998) :<br>I : 3000 participants<br>C : 895 participants<br>Follow-up (2003) :<br>I : 2414 participants<br>C : 758 participants   | - Public-private collaboration with the retail sector<br>- Walking and bicycling clubs                                                                                                                                                         | - Nutrition education classes<br>- Nutrition education tours in supermarkets<br>- Food labeling                                                                                                          | - Blood pressure, height, weight, BMI, waist circumference, total cholesterol, HDL cholesterol, glucose concentration (Clinical measurement)                                                                                          | E : The Netherlands, Maastricht                     |

|                                                                                         |           |                                                            |                                                                                                                              |                                                                                                                                              |                                                                                                                                                                                                                                                                                                                 |                                                                                                                                                                                                                                  |                                                                                                                                                                                                                                               |                            |
|-----------------------------------------------------------------------------------------|-----------|------------------------------------------------------------|------------------------------------------------------------------------------------------------------------------------------|----------------------------------------------------------------------------------------------------------------------------------------------|-----------------------------------------------------------------------------------------------------------------------------------------------------------------------------------------------------------------------------------------------------------------------------------------------------------------|----------------------------------------------------------------------------------------------------------------------------------------------------------------------------------------------------------------------------------|-----------------------------------------------------------------------------------------------------------------------------------------------------------------------------------------------------------------------------------------------|----------------------------|
| <b>10. The Well London Project</b><br>Wall M. et al. ; 2009<br>Philips G. et al. ; 2012 | PA and EB | Cluster-randomised controlled design                       | Age >11 years (adults and adolescents)<br>I : 20 deprived neighborhoods in London<br>C : 20 deprived neighborhoods in London | Baseline (2008) :<br>I : 2061 adults and 618 adolescents<br>C : 2046 adults and 596 adolescents<br>Follow-up (2012) :<br>NA                  | <ul style="list-style-type: none"> <li>- Improve the quality of public spaces to encourage physical activity</li> <li>- Improve access to healthy food choices</li> </ul>                                                                                                                                       | <ul style="list-style-type: none"> <li>- Maps informing participants of local sources for making healthy choices</li> <li>- Project to raise awareness of the importance of diet etc.</li> </ul>                                 | <ul style="list-style-type: none"> <li>- Healthy eating, physical activity, mental wellbeing (questionnaires ; FFQ, IPAQ, PAQ-A Hope Scale, EQ5D, Strengths and Difficulties questionnaire and Positive and Negative Affect Scale)</li> </ul> | E : United Kingdom, London |
| <b>11. Looma Healthy Lifestyle Program</b><br>Rowley K.G. et al. ; 2000                 | PA and EB | Pre-experimental design: one group pretest posttest design | Age > 15 years<br>I : Looma Aboriginal community                                                                             | Baseline (1993-1994) :<br>I : 199 participants<br>Follow-up1 (1996) :<br>I : 181 participants<br>Follow-up2 (1997) :<br>I : 125 participants | <ul style="list-style-type: none"> <li>- Improved quality and quantity of fresh products</li> <li>- Replacement of butter with margarine</li> <li>- Availability of wholemeal bread and flour</li> <li>- Family walking groups</li> <li>- Activation of sporting teams</li> <li>- Sporting festivals</li> </ul> | <ul style="list-style-type: none"> <li>- Nutrition education</li> <li>- Healthy cooking classes</li> <li>- Store tours to identify healthy food choices</li> </ul>                                                               | <ul style="list-style-type: none"> <li>- BMI, fasting glucose, insulin, triglyceride (clinical measurements)</li> <li>- Physical activity and dietary habits (questionnaire)</li> </ul>                                                       | NE : Australia, Kimberley  |
| <b>12. Healthy Employee Lifestyle Program</b><br>Perez A.P. et al. ; 2009               | EB        | Pre-experimental design: one group pretest posttest design | Age range not specified<br>I : Employees of the Arkansas Department of Health                                                | Baseline (2005) :<br>I : 1017 participants<br>Follow-up (2006) :<br>I : 214 participants                                                     | <ul style="list-style-type: none"> <li>- Possibility to redeem the earned points for rewards (e.g. water bottles, 3 days of paid leave)</li> </ul>                                                                                                                                                              | <ul style="list-style-type: none"> <li>- Educational information (flyers, posters)</li> <li>- Health promotion activities</li> <li>- Health events</li> </ul>                                                                    | <ul style="list-style-type: none"> <li>- Intake frequency of fat, desserts, protein, grains, dairy, processed meat, fried foods (questionnaire)</li> <li>- Stage of change (questionnaire)</li> </ul>                                         | NE: USA, Arkansas          |
| <b>13. Cycling connecting communities</b><br>Rissel C.E. et al. ; 2010                  | PA        | Cluster-randomised controlled design                       | Age > 18 years<br>I: Fairfield and Liverpool<br>C: Bankstown                                                                 | Baseline (2007):<br>I + C: 1450 participants<br>Follow-up (2009):<br>I: 520 participants<br>C: 389 participants                              | <ul style="list-style-type: none"> <li>- Community rides</li> <li>- Free cycle skill courses</li> </ul>                                                                                                                                                                                                         | <ul style="list-style-type: none"> <li>- ‘Discover Fairfield and Liverpool by bike’ map for illustrating the extent of local bike paths</li> <li>- ‘Thinking about cycling’</li> <li>- Presentation about the project</li> </ul> | <ul style="list-style-type: none"> <li>- Frequency of cycling, PA behaviour, usage of bicycle paths (questionnaire)</li> <li>- Use of bicycle paths (observational study)</li> </ul>                                                          | NE: Australia, Sydney      |
| <b>14. Concord, a great place to be active</b><br>Wen L.M. et al.; 2002                 | PA        | Pre-experimental design: one group pretest posttest design | Age: 20-50 years<br>Women<br>I: Concord<br>Local Government                                                                  | Baseline (1997):<br>I: 1762 participants<br>Follow-up (1999):<br>I: 1801 participants                                                        | <ul style="list-style-type: none"> <li>- Walking groups</li> <li>- Community walking events</li> <li>- Signage</li> <li>- Community physical activity classes</li> </ul>                                                                                                                                        | <ul style="list-style-type: none"> <li>- Media</li> <li>- Newsletters</li> <li>- Walking maps</li> </ul>                                                                                                                         | <ul style="list-style-type: none"> <li>- PA level (questionnaire)</li> </ul>                                                                                                                                                                  | NE: Australia, Sydney      |

|                                                                                                                             |                  |                                                                   |                                                                                                                     |                                                                                                                                                                                                                         |                                                                                                                                                                                                                                                                                                                                                                                                                                |                                                                                                                                                                                                                                                                                                                                         |                                                                                                                                                                                                                                                                                                                                                                              |                                                         |
|-----------------------------------------------------------------------------------------------------------------------------|------------------|-------------------------------------------------------------------|---------------------------------------------------------------------------------------------------------------------|-------------------------------------------------------------------------------------------------------------------------------------------------------------------------------------------------------------------------|--------------------------------------------------------------------------------------------------------------------------------------------------------------------------------------------------------------------------------------------------------------------------------------------------------------------------------------------------------------------------------------------------------------------------------|-----------------------------------------------------------------------------------------------------------------------------------------------------------------------------------------------------------------------------------------------------------------------------------------------------------------------------------------|------------------------------------------------------------------------------------------------------------------------------------------------------------------------------------------------------------------------------------------------------------------------------------------------------------------------------------------------------------------------------|---------------------------------------------------------|
| <p><b>15. The NHF-NRG In Balance Project</b><br/>Kwak L. et al.; 2006<br/>Kwak L. et al.; 2009<br/>Kwak L. et al.; 2010</p> | <p>PA and SB</p> | <p>Cluster-randomised controlled design</p>                       | <p>Area<br/>Age &lt; 40 year<br/>BMI &gt; 18 kg/m<sup>2</sup><br/>I: 6 Dutch worksites<br/>C: 6 Dutch worksites</p> | <p>Baseline (2003)<br/>I: 365 participants<br/>C: 188 participants<br/>Follow-up1 (2004)<br/>I: 294 participants<br/>C: 164 participants<br/>Follow-up2 (2005-2006)<br/>I: 255 participants<br/>C: 145 participants</p> | <ul style="list-style-type: none"> <li>- Form lunch walking groups</li> <li>- Form employee advisory board</li> <li>- Form groups of colleagues that actively commute together</li> <li>- Increase distance from individual offices to printers, faxes, coffee machines etc.</li> <li>- Facilitate of improve shower/change facilities</li> <li>- Facilitate or improve bike sheds</li> <li>- Bike-to-work campaign</li> </ul> | <ul style="list-style-type: none"> <li>- Feedback on measured BMI, fat percentage and waist circumference</li> <li>- In-balance-box: pedometer, waist circumference measuring tape, calorie guide and instruction brochure</li> <li>- In-Balance website</li> <li>- Computer-tailored CD-rom</li> <li>- Posters and leaflets</li> </ul> | <ul style="list-style-type: none"> <li>- Body weight, height, skinfold thickness and waist circumference (clinical measurements)</li> </ul>                                                                                                                                                                                                                                  | <p>E: The Netherlands</p>                               |
| <p><b>16. Familias Sanas y Activas</b><br/>Ayala G.X. et al. ; 2011</p>                                                     | <p>PA</p>        | <p>Pre-experimental design: one group pretest posttest design</p> | <p>Age &gt; 18 years<br/>Women<br/>I: South San Diego county</p>                                                    | <p>Baseline (2007):<br/>I: 337 participants<br/>Follow-up1 (2008):<br/>I: participants<br/>Follow-up2 (2008-2009):<br/>I: 207 participants</p>                                                                          | <ul style="list-style-type: none"> <li>- Incentives for participants: a pedometer, water bottle, stretch band etc.</li> <li>- Free exercise classes in public places</li> </ul>                                                                                                                                                                                                                                                | <ul style="list-style-type: none"> <li>- PA promotional material (e.g. community resource guide of free and low-cost PA resources)</li> <li>- Walking path maps</li> </ul>                                                                                                                                                              | <ul style="list-style-type: none"> <li>- Sitting resting blood pressure, waist circumference, weight, height (clinical measurements)</li> <li>- Leg and hamstrings flexibility (Sit-and-reach test)</li> <li>- Aerobic fitness (6-minute walk test)</li> <li>- Physical activity (questionnaire ; GPAQ )</li> <li>- Psychosocial variables (questionnaire ; GRAD)</li> </ul> | <p>NE: USA, San Diego County</p>                        |
| <p><b>17. Samoan communities church intervention</b><br/>Bell A.C. at al.; 2001</p>                                         | <p>PA and EB</p> | <p>Cluster-randomised controlled design</p>                       | <p>Age: 20-77 years<br/>Samoan church community members<br/>I: Otara<br/>C: Glen Innes and Glen Eden</p>            | <p>Baseline (1995-1996):<br/>I: 365 participants<br/>C: 106 participants<br/>Follow-up (1996):<br/>I: 275 participants<br/>C: 71 participants</p>                                                                       | <ul style="list-style-type: none"> <li>- Aerobic sessions</li> <li>- Walking clubs</li> </ul>                                                                                                                                                                                                                                                                                                                                  | <ul style="list-style-type: none"> <li>- Nutrition education sessions</li> </ul>                                                                                                                                                                                                                                                        | <ul style="list-style-type: none"> <li>- Diet and lifestyle behaviour (questionnaire)</li> <li>- Fat knowledge (questionnaire)</li> <li>- PA (questionnaire)</li> <li>- Anthropometric measurement and blood pressure (clinical measurements)</li> </ul>                                                                                                                     | <p>NE: New-Zealand, Otara, Glen Innes and Glen Eden</p> |
| <p><b>18. Health-e-AME</b><br/>Bopp M. et al.; 2007</p>                                                                     | <p>PA</p>        | <p>Cluster-randomised</p>                                         | <p>Age &gt; 18 years<br/>AME church</p>                                                                             | <p>Baseline (2002):<br/>I: 311 participants</p>                                                                                                                                                                         | <ul style="list-style-type: none"> <li>- Praise aerobics</li> <li>- Walking programs</li> </ul>                                                                                                                                                                                                                                                                                                                                | <ul style="list-style-type: none"> <li>- Educational messages</li> </ul>                                                                                                                                                                                                                                                                | <ul style="list-style-type: none"> <li>- Physical activity behaviour (questionnaire);</li> </ul>                                                                                                                                                                                                                                                                             | <p>NE: South Carolina</p>                               |

|                                                                                                                 |           |                                                            |                                                                                |                                                                                                                                                     |                                                                                                                                                                                                           |                                                                                                                                       |                                                                                                                                                                                                                                                                                                   |                         |
|-----------------------------------------------------------------------------------------------------------------|-----------|------------------------------------------------------------|--------------------------------------------------------------------------------|-----------------------------------------------------------------------------------------------------------------------------------------------------|-----------------------------------------------------------------------------------------------------------------------------------------------------------------------------------------------------------|---------------------------------------------------------------------------------------------------------------------------------------|---------------------------------------------------------------------------------------------------------------------------------------------------------------------------------------------------------------------------------------------------------------------------------------------------|-------------------------|
| Wilcox S. et al.; 2007<br>Bopp M. et al.; 2009                                                                  |           | controlled design                                          | members<br>I: eleven AME churches<br>C: nine AME churches                      | C: 260 participants<br>Follow-up1: 418 participants<br>Follow-up2: 316 participants                                                                 | - Health directors or physical activity coordinators                                                                                                                                                      |                                                                                                                                       | BRFSS)<br>- Health-related variables (questionnaire)                                                                                                                                                                                                                                              |                         |
| <b>19. Body and Soul</b><br>Resnicow K. et al.; 2004<br>Campbell M.K. et al. ; 2007<br>Allicock M. et al.; 2012 | EB        | Cluster-randomised controlled design                       | Age > 18 years<br>African American church members                              | Baseline:<br>I+ C: 1022 participants<br>Follow-up:<br>I+C: 864 participants                                                                         | - Pastor support<br>- Motivational interviewing                                                                                                                                                           | - Nutrition events<br>- Food demonstrations<br>- Supermarket tours<br>- Information sessions<br>- Self-help materials (e.g. cookbook) | - Fruit and vegetable intake (questionnaire; FFQ)<br>- Fat intake (questionnaire; NCI Fat Screener)<br>- Vegetable preparation practices (questionnaire)<br>- Intrinsic, extrinsic motivation, social support, self-efficacy (questionnaire)<br>- Program exposure and attendance (questionnaire) | NE: USA, North Carolina |
| <b>20. Walk Kansas</b><br>Estabrooks P.A. et al.; 2008                                                          | PA        | Pre-experimental design: one group pretest posttest design | Age > 18 years<br>I: Kansas                                                    | Baseline:<br>I: 1045 participants<br>Follow-up:<br>I: 900 participants<br>Follow-up 6 month after completion of the program:<br>I: 278 participants | - Social support (team competition)                                                                                                                                                                       | - Weekly newsletter<br>- Goal setting<br>- Healthy tips<br>- Celebration event                                                        | - PA (questionnaire, BRFSS)                                                                                                                                                                                                                                                                       | NE: USA, Kansas         |
| <b>21. Worksite intervention among Metropolitan Transit Workers</b><br>French S.A. et al. ; 2010                | PA and EB | Cluster-randomised controlled design                       | Age range not specified<br>Metropolitan Transit Workers                        | Baseline (2005):<br>I+C: 1102 participants<br>Follow-up (2007):<br>I+C: 940 participants                                                            | - Increased availability of healthful food and beverage in vending machines<br>- Lower prices for healthy food<br>- Fitness facilities<br>- Self-weighting team competition<br>- Team walking competition | - A free one-day health expo was held to increase awareness                                                                           | - Weight and height (clinical measurement)<br>- Dietary intake, physical activity (questionnaire, FFQ, dietary recall, Godin leisure time PA and accelerometry)<br>- Perceived worksite environment and social support (questionnaire)                                                            | NE: USA, Mineapolis     |
| <b>22. Merrill Lynch Intervention</b><br>Gemson D.H. et al.; 2008                                               | PA and EB | Cluster-randomised controlled design                       | Age range not specified<br>Employees with high blood pressure of Merrill Lynch | Baseline (2004):<br>I: 298 participants<br>C: 255 participants<br>Follow-up (2005):<br>I: 47 participants<br>C: 94 participants                     | - Variety of fruits in the cafeteria                                                                                                                                                                      | - Screening program<br>- Health information<br>- Educational brochures<br>- Pedometers<br>- Information of nurses                     | - Blood pressure (clinical measurements)<br>- PA, diet and nutrition behaviours, pedometer use, weight, and motivation to change (questionnaire)                                                                                                                                                  | NE: USA                 |

|                                                                                                                 |                  |                                             |                                                                                  |                                                                                                                                                                                                                                                                                                                                                                                                                                               |                                                                                                                                                                                                                               |                                                                                                                                                                                                 |                                                                                                                                                                                                                                              |                                                             |
|-----------------------------------------------------------------------------------------------------------------|------------------|---------------------------------------------|----------------------------------------------------------------------------------|-----------------------------------------------------------------------------------------------------------------------------------------------------------------------------------------------------------------------------------------------------------------------------------------------------------------------------------------------------------------------------------------------------------------------------------------------|-------------------------------------------------------------------------------------------------------------------------------------------------------------------------------------------------------------------------------|-------------------------------------------------------------------------------------------------------------------------------------------------------------------------------------------------|----------------------------------------------------------------------------------------------------------------------------------------------------------------------------------------------------------------------------------------------|-------------------------------------------------------------|
| <p><b>23. Dow Chemical Company Intervention</b><br/>Goetzel R.Z. et al.; 2009<br/>Goetzel R.Z. et al.; 2010</p> | <p>PA and EB</p> | <p>Cluster-randomised controlled design</p> | <p>Company<br/>Age range not specified<br/>Employees of Dow Chemical Company</p> | <p>Baseline (2006):<br/>I: 4231 participants (health risk assessment)<br/>2924 participants (biometric measurements)<br/>C: 978 participants (health risk assessment)<br/>646 participants (biometric measurements)<br/>Follow-up (2007):<br/>I: 2518 participants (health risk assessment)<br/>1583 participants (biometric measurements)<br/>C: 634 participants (health risk assessment)<br/>417 participants (biometric measurements)</p> | <ul style="list-style-type: none"> <li>- Environmental prompts to encourage healthy food choices and PA behaviour</li> <li>- Modifying vending machine items and cafeteria menus</li> <li>- Creating walking paths</li> </ul> | <ul style="list-style-type: none"> <li>- Health education material (newsletters, posters, mailing, etc.)</li> <li>- PA and weight management counseling</li> <li>- Health assessment</li> </ul> | <ul style="list-style-type: none"> <li>- Health behaviours (questionnaire)</li> <li>- Biometric screening measurement: height, weight, blood pressure (clinical measurements)</li> </ul>                                                     | <p>NE: USA, Texas, Louisiana, New Jersey, West Virginia</p> |
| <p><b>24. Eating for a Healthy Life</b><br/>Hannon P.A. et al.; 2008<br/>Bowen D.J. et al.; 2009</p>            | <p>EB</p>        | <p>Cluster-randomised controlled design</p> | <p>Age &gt; 18 years<br/>Members of faith communities</p>                        | <p>Baseline:<br/>I: 1099 participants<br/>C: 1076 participants<br/>Follow-up:<br/>I: 996 participants<br/>C: 959 participants</p>                                                                                                                                                                                                                                                                                                             | <ul style="list-style-type: none"> <li>- Social activities</li> </ul>                                                                                                                                                         | <ul style="list-style-type: none"> <li>- Healthful eating sessions (educational classes)</li> <li>- Motivational messages</li> </ul>                                                            | <ul style="list-style-type: none"> <li>- Dietary behaviour (questionnaire; Fat and Fiber Behaviour Questionnaire and 24-hour dietary recall)</li> <li>- Stages of change, perceived health (questionnaire)</li> </ul>                        | <p>NE: Seattle, Washington</p>                              |
| <p><b>25. Worksite Opportunities for Wellness (WOW)</b><br/>Racette S.B. et al.; 2009</p>                       | <p>PA and EB</p> | <p>Cluster-randomised controlled design</p> | <p>Age &gt; 18 years<br/>Employees of a large medical center in St.-Louis</p>    | <p>Baseline (2005):<br/>C: 67 participants<br/>I: 84 participants<br/>Follow-up (2006):<br/>C: 55 participants<br/>I: 68 participants</p>                                                                                                                                                                                                                                                                                                     | <ul style="list-style-type: none"> <li>- Weekly healthy snack card</li> <li>- Exercise program</li> <li>- Team competition</li> <li>- Participation rewards</li> </ul>                                                        | <ul style="list-style-type: none"> <li>- Pedometers</li> <li>- One site Weight-Watchers group meetings</li> <li>- Newsletters</li> <li>- Walking maps</li> </ul>                                | <ul style="list-style-type: none"> <li>- Health assessment: height, weight, waist circumference, body composition, resting heart rate, blood pressure, fasting lipids and glucose, cardiovascular fitness (clinical measurements)</li> </ul> | <p>NE: USA, Missouri</p>                                    |

|                                                                                 |           |                                                            |                                                                                                |                                                                                                                                   |                                                                                                                                              |                                                                                                                                              |                                                                                                                                                                                                       |                             |
|---------------------------------------------------------------------------------|-----------|------------------------------------------------------------|------------------------------------------------------------------------------------------------|-----------------------------------------------------------------------------------------------------------------------------------|----------------------------------------------------------------------------------------------------------------------------------------------|----------------------------------------------------------------------------------------------------------------------------------------------|-------------------------------------------------------------------------------------------------------------------------------------------------------------------------------------------------------|-----------------------------|
|                                                                                 |           |                                                            |                                                                                                |                                                                                                                                   |                                                                                                                                              |                                                                                                                                              | - Dietary and PA patterns (questionnaires; National Institutes of health fruit and vegetable screener, The Kristal Fat and Fiber Behaviour Questionnaire and the IPAQ)                                |                             |
| <b>26. Community intervention Bangladesh</b><br>Rana A.K.M. et al.; 2009        | PA and EB | Cluster-randomised controlled design                       | Age > 60 years<br>I: 4 rural communities in Bangladesh<br>C: 4 rural communities in Bangladesh | Baseline (2003):<br>C: 517 participants<br>I: 514 participants<br>Follow-up (2004):<br>C: 414 participants<br>I: 425 participants | - Training on physical activity<br>- Social support                                                                                          | - Advice to avoid harmful food items<br>- Posters and leaflets to raise awareness                                                            | - Health related quality of life (questionnaire)                                                                                                                                                      | NE: Bangladesh              |
| <b>27. Elementary school personnel intervention</b><br>Siegel J.M. et al.; 2010 | PA and EB | Cluster-randomised controlled design                       | Age range not specified<br>I: Personnel of 8 schools<br>C: Personnel of 8 schools              | Baseline (2005):<br>C: 288 participants<br>I: 145 participants<br>Follow-up (2007):<br>C: 125 participants<br>I: 66 participants  | - Healthy snacks at meetings<br>- Walking clubs<br>- Interschool competition (with prizes)                                                   | - Newsletter<br>- Healthy cooking classes                                                                                                    | - Weight, height, waist – and hip circumferences (clinical measurements)<br>- Physical activity and fruit and vegetables consumption (questionnaires: IPAQ and NCI all day screener)                  | NE: Los Angeles, California |
| <b>28. Academia Da Cidade</b><br>Simoes E.J. et al.; 2009                       | PA and EB | Pre-experimental design: one group posttest only design    | Age > 16 years<br>Residents of Recife                                                          | (2007):<br>2046 participants                                                                                                      | - Free supervised PA lessons                                                                                                                 | - Nutrition education<br>- Health monitoring                                                                                                 | - Leisure time PA and transport PA (questionnaire, IPAQ)<br>- Participation and awareness of the activities (questionnaire)                                                                           | NE: Recife, Brazilia        |
| <b>29. Beijing University Inytervention</b><br>Xiangyang T. et al.; 2003        | PA and EB | Pre-experimental design: one group pretest posttest design | Age range not specified<br>Employees and students of Beijing University                        | Baseline (1999):<br>2360 participants<br>Follow-up (2000):<br>2347 participants                                                   | - Workshops to develop healthy policies (e.g. provision of healthy food, routine annual physical examination etc.)                           | - Booklets, lecturers, interactive arena for health consultations, etc.                                                                      | - Health knowledge, lifestyle behaviours: physical activity, smoking, dietary behaviour, sexual intercourse and mental health (questionnaire)                                                         | NE: Beijing                 |
| <b>30. Heart at Work</b><br>Pegus C. et al.; 2002                               | PA and EB | Cluster-randomised controlled design                       | Age range not specified<br>Employees of American worksites                                     | Baseline (1998):<br>I: NA<br>C: NA<br>follow-up (1999):<br>I: 223 participants<br>C: 410 participants                             | - Walking group led by an coordinator who encourages the participants<br>- Health care coordinator<br>- Walking track was constructed on the | - E-mails messages and memos, flyers and posters,<br>- Small incentives: T-shirts, bags etc.<br>- Information about how to reduce fat intake | - Knowledge of CVD risk factors, nutrition and diet, self-efficacy (questionnaire)<br>- PA, weight management, CVD-related diet and nutrition and tobacco use (questionnaire)<br>- Cholesterol, blood | NE: USA                     |



|                                                                                                                                                          |           |                                                            |                                                                                                                                       |                                                                                   |                                                                                                                                                   |                                                                           |                                                                                                                                                                                                                                                    |                                                                |
|----------------------------------------------------------------------------------------------------------------------------------------------------------|-----------|------------------------------------------------------------|---------------------------------------------------------------------------------------------------------------------------------------|-----------------------------------------------------------------------------------|---------------------------------------------------------------------------------------------------------------------------------------------------|---------------------------------------------------------------------------|----------------------------------------------------------------------------------------------------------------------------------------------------------------------------------------------------------------------------------------------------|----------------------------------------------------------------|
|                                                                                                                                                          |           |                                                            |                                                                                                                                       |                                                                                   | factory grounds<br>- Vending machines stocked more low-fat snacks<br>- Low-fat lunch option                                                       |                                                                           | pressure (clinical measurements)                                                                                                                                                                                                                   |                                                                |
| <b>31. Pasos Adelante</b><br>Staten L.K. et al.; 2005                                                                                                    | PA and EB | Pre-experimental design: one group pretest posttest design | Age range not specified<br>I: Yuma and Santa Cruz counties                                                                            | Baseline (2000-2003): 248 participants<br>Follow-up (2000-2003): 216 participants | - Walking club/group                                                                                                                              | - Lectures on health<br>- Educational classroom session on health         | - Food intake and physical activity (questionnaires; Behavioural Risk Factor Surveillance Survey and Minnesota Leisure Time Physical Activity Questionnaire)                                                                                       | NE: USA; Arizona, United States-Sonora, Mexico border counties |
| <b>32. Wijkgezondheids-werk – Gezond in de buurt</b><br>Kloek G.C. et al.; 2006<br>Kloek G.C. et al.; 2006                                               | PA and EB | Cluster-randomised controlled design                       | Age: 18-65 years<br>I: Tivoli and De Bennekel (deprived neighborhoods in Eindhoven)<br>C: Three comparison neighborhoods in Eindhoven | Baseline (2000):<br>I: 1426<br>C: 1355<br>Follow-up (2002):<br>I: 1021<br>C: 908  | - Neighborhoods walking tours<br>- Gymnastic classes<br>- Large community events related to health<br>- Collaboration with the greengrocer's shop | - Information on healthy nutrition                                        | - Intervention awareness (questionnaire)<br>- Daily fruit and vegetable intake and physical activity (questionnaires: Food Frequency Questionnaire, SQUASH)<br>- Attitude, self-efficacy expectations, awareness, stages of change (questionnaire) | E: The Netherlands; Eindhoven                                  |
| <b>33. The Groninger Active Living Model</b><br>Stevens M. et al.; 2008<br>De Jong J. et al.; 2006<br>De Jong J. et al.; 2007<br>Stevens M. et al.; 2003 | PA        | Cluster-randomised controlled trial                        | Age: 55-65 years<br>I: 6 neighborhoods in 3 Dutch municipalities<br>C: 6 neighborhoods in 3 Dutch municipalities                      | Baseline (2000):<br>I: 163<br>C: 152<br>Follow-up (2001):<br>I: 79<br>C: 102      | - Group physical activity sessions                                                                                                                | - Sport and exercise advice                                               | - Physical activity (Voorrips Physical Activity questionnaire)<br>- Perceived fitness (Groningen Fitness test for elderly questionnaire)<br>- Fitness (Groninger Fitness test)<br>- Blood pressure, body fat and BMI (clinical measures)           | E: The Netherlands                                             |
| <b>34. The Navajo Healthy Stores Program</b><br>Gittelsohn J. et al.; 2013                                                                               | EB        | Cluster-randomised controlled trial                        | Age: ≥ 18 years<br>I+C: 10 store regions in the Navaja Nation                                                                         | Baseline:<br>I+C: 276<br>Follow-up:<br>I+C: 145                                   | - Increase availability of healthy food                                                                                                           | - Promotion of healthy foods<br>- Demonstrating healthier cooking methods | - Attitudes, knowledge and dietary behaviour (Adult Impact Questionnaire)<br>- Intervention exposure (Intervention Exposure Questionnaire)                                                                                                         | NE: USA, Arizona                                               |

|                                                                |           |                                                            |                                                                                            |                                                                                   |                                                                                                                                                                                                                                                         |                                                         |                                                                                                                                                                                                                                                           |                     |
|----------------------------------------------------------------|-----------|------------------------------------------------------------|--------------------------------------------------------------------------------------------|-----------------------------------------------------------------------------------|---------------------------------------------------------------------------------------------------------------------------------------------------------------------------------------------------------------------------------------------------------|---------------------------------------------------------|-----------------------------------------------------------------------------------------------------------------------------------------------------------------------------------------------------------------------------------------------------------|---------------------|
| <b>35. The Healthy Alberta Communities</b><br>Raine K.D.; 2013 | PA and EB | Pre-experimental design: one group pretest posttest design | Age: $\geq 18$ years<br>I: 4 communities in Alberta<br>C: all other communities in Alberta | Baseline (2006):<br>I: 4761<br>C: 9775<br>Follow-up (2009):<br>I: 4733<br>C: 9784 | - Increase access to fruit and vegetables<br>- Increase accessibility of community recreation space<br>-Increase healthy restaurant options<br>- Increase opportunities for unstructured physical activity<br>-Increase the capacity of social programs | - Promotion of physical activity and healthy food items | - Health status, physical activity and dietary behaviour, height and weight (Canadian Community Health Survey)<br>-Anthropometric measures and blood pressure (clinical measures)<br>- Cholesterol, glucose, lipoprotein and triglycerides (blood sample) | NE: Canada, Alberta |
|----------------------------------------------------------------|-----------|------------------------------------------------------------|--------------------------------------------------------------------------------------------|-----------------------------------------------------------------------------------|---------------------------------------------------------------------------------------------------------------------------------------------------------------------------------------------------------------------------------------------------------|---------------------------------------------------------|-----------------------------------------------------------------------------------------------------------------------------------------------------------------------------------------------------------------------------------------------------------|---------------------|

\* PA = physical activity; SB = sedentary behaviour; EB = eating behaviour

\*\* I = Intervention group; C = control group

\*\*\* E = European study; NE = Non-European study
